# Supplementary material for: Cost-effective hydrotalcite-derived Fe-based catalysts for stable and continuous catalytic methane decomposition
Source: Royal Society of Chemistry journal article supplement (doi:10.1039/d5ta07274c), 2025-11-06
Supplement: d5ta07274c1.pdf [file d5ta07274c1.pdf]

## Supplementary Information

### Cost-Effective Hydrotalcite-Derived Fe-Based Catalysts for Stable and Continuous Catalytic Methane Decomposition

Xiaoxin Li<sup>1</sup>, Shuzhi Zhao<sup>2</sup>, Chao Deng<sup>1</sup>, Rong Chen<sup>1</sup>, Furong Xie<sup>1</sup>, Zinan Wu<sup>1</sup>,  
Zifeng Ma<sup>2,\*</sup>, Guo-Ming Weng<sup>1,\*</sup>

<sup>1</sup> Shanghai Key Laboratory of Hydrogen Science & Center of Hydrogen Science,  
School of Materials Science and Engineering, Shanghai Jiao Tong University, Shanghai  
200240 P. R. China

<sup>2</sup> Shanghai Electrochemical Energy Devices Research Center, School of Chemistry and  
Chemical Engineering, Shanghai Jiao Tong University, Shanghai 200240, China

\* Email: [zfma@sjtu.edu.cn](mailto:zfma@sjtu.edu.cn); [guoming.weng@sjtu.edu.cn](mailto:guoming.weng@sjtu.edu.cn)

#### Chemicals and materials

Ferrous chloride tetrahydrate ( $\text{FeCl}_2 \cdot 4\text{H}_2\text{O}$ , 99%), Ferric nitrate nonahydrate ( $\text{Fe}(\text{NO}_3)_3 \cdot 9\text{H}_2\text{O}$ , and Sodium hydroxide ( $\text{NaOH}$ ,  $\geq 96\%$ ), were purchased from Sinopharm Chemical reagent Co., Ltd. Aluminium nitrate nonahydrate ( $\text{Al}(\text{NO}_3)_3 \cdot 9\text{H}_2\text{O}$ , 99.5%) was obtained from Anhui Senrise Technologies Co., Ltd. Sodium carbonate ( $\text{Na}_2\text{CO}_3$ , 99.8%) was purchased from General-reagent. Alumina ( $\gamma\text{-Al}_2\text{O}_3$ , 20nm,  $\geq 99.99\%$ ) was obtained from Shanghai aladdin Biochemical Technology Co., Ltd. Deionized water was obtained from a Water Purifier apparatus (Hitech, PF-10D). All reagents were used without further purification.

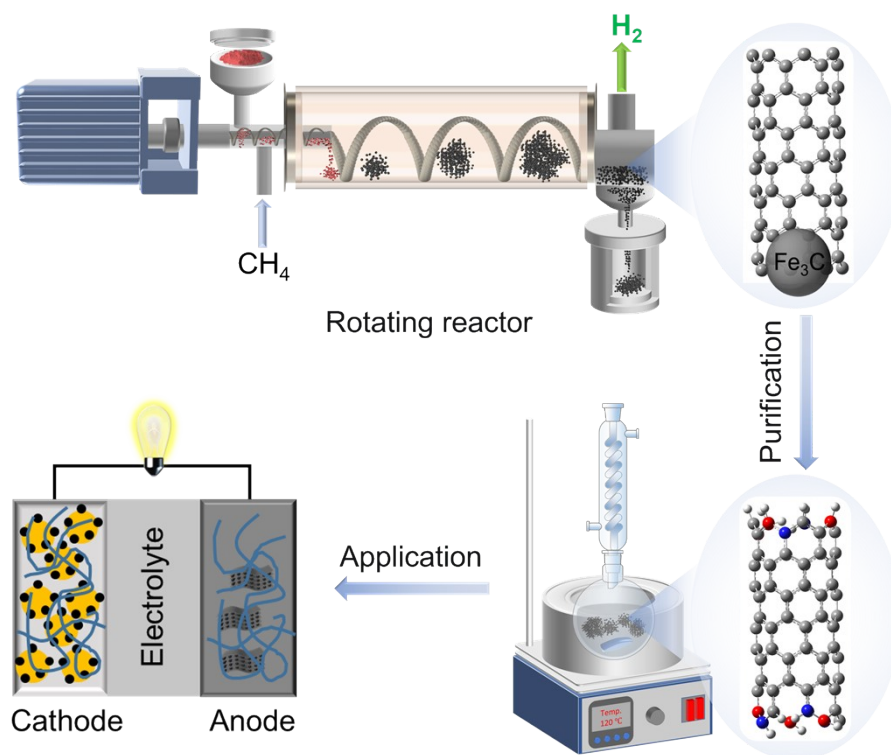

**Figure S1.** The concept of a rotating reactor (ref. 1) for continuous CMD combined with the purification and battery application of carbon products.

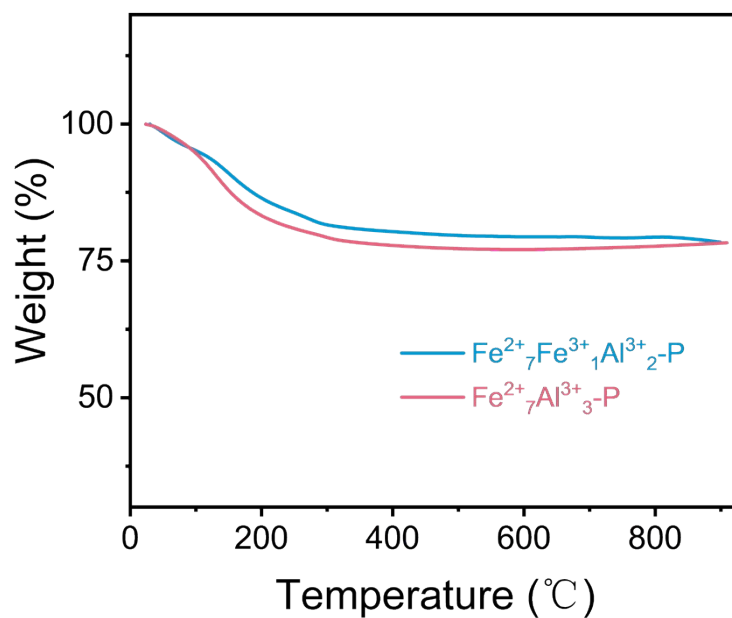

**Figure S2.** TGA of precursors.  $\text{Fe}^{2+}_7\text{Al}^{3+}_3\text{-P}$  (red plot);  $\text{Fe}^{2+}_7\text{Fe}^{3+}_1\text{Al}^{3+}_2\text{-P}$  (blue plot). The precursors were heated from room temperature to 900 °C with a heating rate of 5 °C min<sup>-1</sup> under air condition.

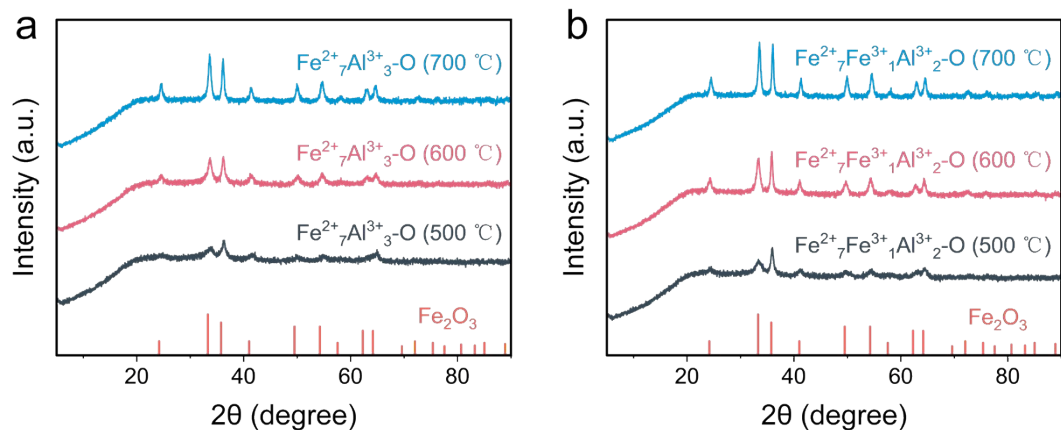

**Figure S3.** (a) and (b) are XRD patterns of  $\text{Fe}^{2+}_7\text{Al}^{3+}_3\text{-O}$  and  $\text{Fe}^{2+}_7\text{Fe}^{3+}_1\text{Al}^{3+}_2\text{-O}$  at different calcination temperatures (i.e., 500, 600 and 700 °C), respectively.

**Table S1. Summary of  $\text{Fe}_2\text{O}_3$  crystal size corresponding to corresponding to Figure S3.**

| Catalyst                                                             | $\text{Fe}_2\text{O}_3$ crystal sized (nm) |
|----------------------------------------------------------------------|--------------------------------------------|
| $\text{Fe}^{2+}_7\text{Al}^{3+}_3\text{-O}$ (600 °C)                 | 16.7                                       |
| $\text{Fe}^{2+}_7\text{Al}^{3+}_3\text{-O}$ (700 °C)                 | 17.4                                       |
| $\text{Fe}^{2+}_7\text{Fe}^{3+}_1\text{Al}^{3+}_2\text{-O}$ (600 °C) | 18.2                                       |
| $\text{Fe}^{2+}_7\text{Fe}^{3+}_1\text{Al}^{3+}_2\text{-O}$ (700 °C) | 22.3                                       |

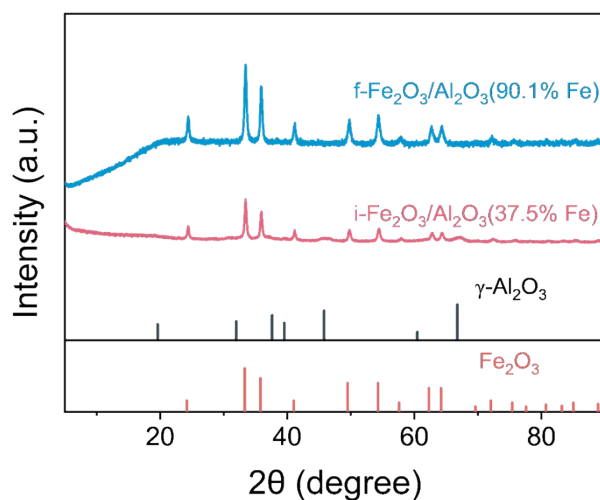

**Figure S4.** XRD patterns of Fe-based catalyst synthesized by impregnation (i-Fe<sub>2</sub>O<sub>3</sub>/Al<sub>2</sub>O<sub>3</sub> (37.5% Fe)) and fusion method (f-Fe<sub>2</sub>O<sub>3</sub>/Al<sub>2</sub>O<sub>3</sub> (90.1% Fe)).

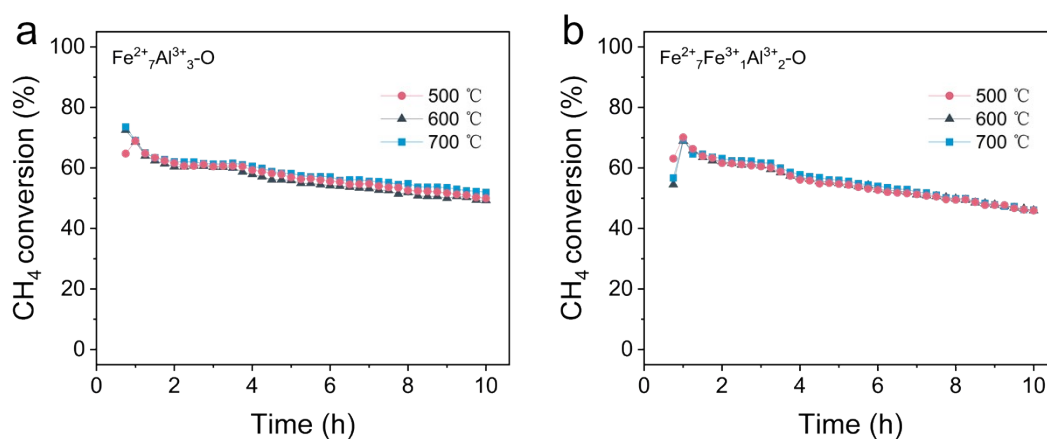

**Figure S5.** (a) and (b) are CH<sub>4</sub> conversion efficiency of Fe<sup>2+</sup><sub>7</sub>Al<sup>3+</sup><sub>3</sub>-O and Fe<sup>2+</sup><sub>7</sub>Fe<sup>3+</sup><sub>1</sub>Al<sup>3+</sup><sub>2</sub>-O, respectively, generated from different calcination temperatures.

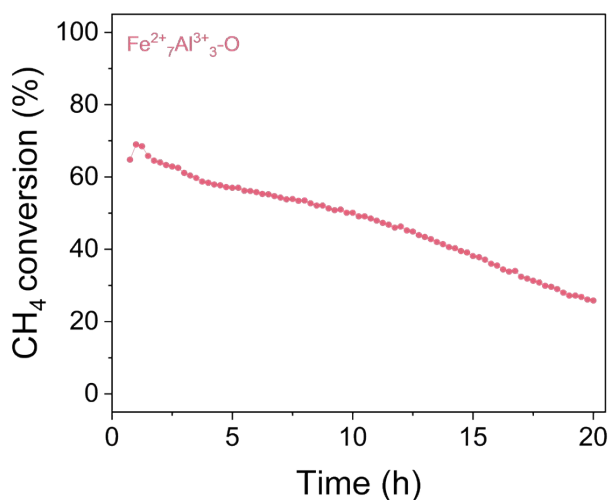

**Figure S6.** CH<sub>4</sub> conversion efficiency of Fe<sup>2+</sup><sub>7</sub>Al<sup>3+</sup><sub>3</sub>-O at reaction temperature of 730 °C under 4 sccm for 20 h.

**Table S2. Summary of CMD conditions for Figure S5, Figure S6, and Figure 5.**

| Catalyst                                                                                              | Weight (g) | Carbon Products (g) | Temp. (°C) | Reduction gas & reaction gas (sccm) | Space velocity (L h <sup>-1</sup> g <sup>-1</sup> ) |
|-------------------------------------------------------------------------------------------------------|------------|---------------------|------------|-------------------------------------|-----------------------------------------------------|
| Fe <sup>2+</sup> <sub>7</sub> Al <sup>3+</sup> <sub>3</sub> -O                                        | 0.1        | 0.4689              | 850        | 4/CH <sub>4</sub>                   | 2.4                                                 |
|                                                                                                       |            | 0.6456              | 800        |                                     |                                                     |
|                                                                                                       |            | 0.9424              | 750        |                                     |                                                     |
|                                                                                                       |            | 0.9509              | 730        |                                     |                                                     |
|                                                                                                       |            | 1.4002              | 730 (20h)  |                                     |                                                     |
|                                                                                                       |            | 0.9315              | 710        |                                     |                                                     |
|                                                                                                       |            | 0.6237              | 650        |                                     |                                                     |
| Fe <sup>2+</sup> <sub>7</sub> Al <sup>3+</sup> <sub>3</sub> -O                                        | 0.2 g      | 1.0296              | 730        |                                     | 1.2                                                 |
| Fe <sup>2+</sup> <sub>7</sub> Al <sup>3+</sup> <sub>3</sub> -O                                        | 0.05       | 0.7725              | 730        |                                     | 4.8                                                 |
| Fe <sup>2+</sup> <sub>7</sub> Al <sup>3+</sup> <sub>3</sub> -O (600 °C)                               | 0.1        | 0.9615              | 730        |                                     | 2.4                                                 |
| Fe <sup>2+</sup> <sub>7</sub> Al <sup>3+</sup> <sub>3</sub> -O (700 °C)                               | 0.1        | 0.9787              | 730        |                                     | 2.4                                                 |
| Fe <sup>2+</sup> <sub>7</sub> Fe <sup>3+</sup> <sub>1</sub> Al <sup>3+</sup> <sub>2</sub> -O          | 0.1        | 0.5432              | 850        |                                     | 2.4                                                 |
|                                                                                                       |            | 0.5085              | 800        |                                     |                                                     |
|                                                                                                       |            | 0.8522              | 750        |                                     |                                                     |
|                                                                                                       |            | 0.9260              | 730        |                                     |                                                     |
|                                                                                                       |            | 0.8865              | 710        |                                     |                                                     |
|                                                                                                       |            | 0.6851              | 650        |                                     |                                                     |
| Fe <sup>2+</sup> <sub>7</sub> Fe <sup>3+</sup> <sub>1</sub> Al <sup>3+</sup> <sub>2</sub> -O          | 0.2 g      | 1.0697              | 730        |                                     | 1.2                                                 |
| Fe <sup>2+</sup> <sub>7</sub> Fe <sup>3+</sup> <sub>1</sub> Al <sup>3+</sup> <sub>2</sub> -O          | 0.05       | 0.7020              | 730        |                                     | 4.8                                                 |
| Fe <sup>2+</sup> <sub>7</sub> Fe <sup>3+</sup> <sub>1</sub> Al <sup>3+</sup> <sub>2</sub> -O (600 °C) | 0.1        | 0.9043              | 730        |                                     | 2.4                                                 |
| Fe <sup>2+</sup> <sub>7</sub> Fe <sup>3+</sup> <sub>1</sub> Al <sup>3+</sup> <sub>2</sub> -O (700 °C) | 0.1        | 0.9170              | 730        |                                     | 2.4                                                 |

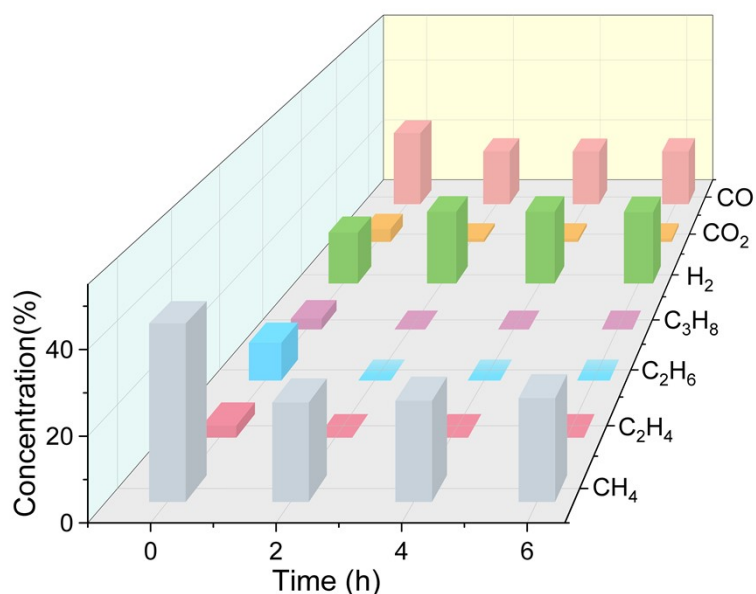

**Figure S7.** The three-dimensional bar chart depicting the variation of different components in mixed gas, at reaction time of 0, 2, 4, and 6 h. The experiment was performed using 0.1 g  $\text{Fe}^{2+}_7\text{Al}^{3+}_3\text{-O}$  as catalyst at 730 °C, with mixed gas flow rate of 4 sccm.

**Table S3.** The carbon products and concentration of various components in mixed gas at different reaction time corresponding to **Figure S7**.

| Gas                           | Concentration<br>(0 h, %) | Concentration<br>(2 h, %) | Concentration<br>(4 h, %) | Concentration<br>(6 h, %) |
|-------------------------------|---------------------------|---------------------------|---------------------------|---------------------------|
| CH <sub>4</sub>               | 42                        | 23.4                      | 23.8                      | 24.4                      |
| C <sub>2</sub> H <sub>4</sub> | 3                         | 0                         | 0                         | 0                         |
| C <sub>2</sub> H <sub>6</sub> | 10                        | 0                         | 0                         | 0                         |
| C <sub>3</sub> H <sub>8</sub> | 3                         | 0                         | 0                         | 0                         |
| H <sub>2</sub>                | 15                        | 21.1                      | 21.1                      | 21                        |
| CO <sub>2</sub>               | 4                         | 1                         | 1                         | 1                         |
| CO                            | 23                        | 17.1                      | 17                        | 17.1                      |

**Carbon products:** 0.4924 g

Note: The gas samples were qualified and quantified by GC-MS (gas chromatograph-mass spectrometer).

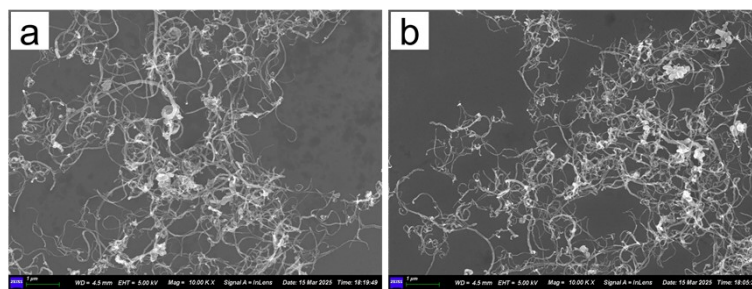

**Figure S8.** Low-magnification SEM images of (a) CNT ( $\text{Fe}^{2+}_7\text{Al}^{3+}_3\text{-O}$ ) and (b) CNT ( $\text{Fe}^{2+}_7\text{Fe}^{3+}_1\text{Al}^{3+}_2\text{-O}$ )

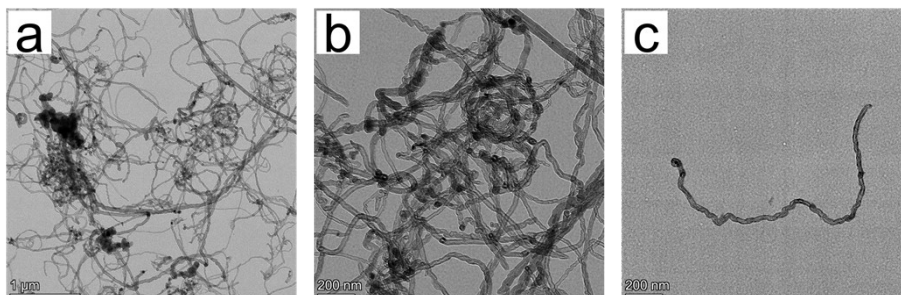

**Figure S9.** (a), (b) and (c) TEM images of CNT ( $\text{Fe}^{2+}_7\text{Fe}^{3+}_1\text{Al}^{3+}_2\text{-O}$ ) at different magnification scales, respectively.

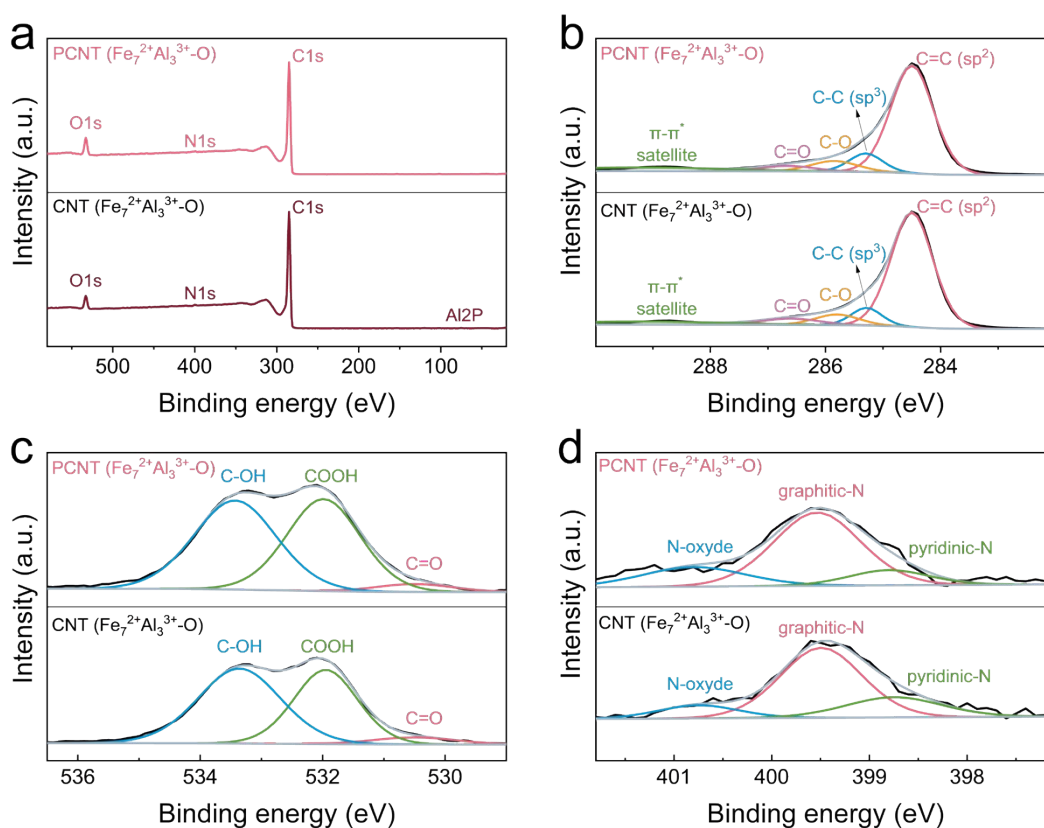

**Figure S10.** (a) XPS survey spectra of CNT ( $\text{Fe}^{2+}_7\text{Al}^{3+}_3\text{-O}$ ) and PCNT ( $\text{Fe}^{2+}_7\text{Al}^{3+}_3\text{-O}$ ). (b), (c) and (d) are high resolution XPS spectra of C 1s, O 1s, and N 1s, respectively, for CNT ( $\text{Fe}^{2+}_7\text{Al}^{3+}_3\text{-O}$ ) and PCNT ( $\text{Fe}^{2+}_7\text{Al}^{3+}_3\text{-O}$ ).

**Table S4. The relative concentration (atomic percentage, at%) of different elements in CNT (commercial), CNT ( $\text{Fe}^{2+}_7\text{Al}^{3+}_3\text{-O}$ ) and PCNT ( $\text{Fe}^{2+}_7\text{Al}^{3+}_3\text{-O}$ ).**

| Element<br>Carbon                                       | C1s   | N1s  | O1s  | Al2P | Fe2p |
|---------------------------------------------------------|-------|------|------|------|------|
| CNT<br>(commercial) <sup>2</sup>                        | 97.48 | 0.20 | 2.33 | 0    | 0    |
| CNT<br>( $\text{Fe}^{2+}_7\text{Al}^{3+}_3\text{-O}$ )  | 94.25 | 0.44 | 5.08 | 0.23 | 0    |
| PCNT<br>( $\text{Fe}^{2+}_7\text{Al}^{3+}_3\text{-O}$ ) | 92.98 | 0.42 | 6.60 | 0    | 0    |

**Table S5. Binding energy and the relative concentration (at%) of C species in the CNT ( $\text{Fe}^{2+}_7\text{Al}^{3+}_3\text{-O}$ ) and PCNT ( $\text{Fe}^{2+}_7\text{Al}^{3+}_3\text{-O}$ ).**

| Group                                                                               | C-C ( $\text{sp}^2$ ) | C-C ( $\text{sp}^3$ ) | C=O   | C-O   | $\pi=\pi^*$<br>satellite |
|-------------------------------------------------------------------------------------|-----------------------|-----------------------|-------|-------|--------------------------|
| Binding Energy (eV)                                                                 | 284.5                 | 285.3                 | 285.8 | 286.6 | 289.2                    |
| relative concentration (at%)<br>CNT( $\text{Fe}^{2+}_7\text{Al}^{3+}_3\text{-O}$ )  | 67.91                 | 7.65                  | 6.61  | 5.09  | 6.96                     |
| relative concentration (at%)<br>PCNT( $\text{Fe}^{2+}_7\text{Al}^{3+}_3\text{-O}$ ) | 65.59                 | 8.87                  | 7.06  | 5.14  | 6.22                     |

**Table S6. Binding energy and the relative concentration (at%) of O species in the CNT ( $\text{Fe}^{2+}_7\text{Al}^{3+}_3\text{-O}$ ) and PCNT ( $\text{Fe}^{2+}_7\text{Al}^{3+}_3\text{-O}$ ).**

| Group                                                                               | C=O   | COOH  | C-OH  |
|-------------------------------------------------------------------------------------|-------|-------|-------|
| Binding Energy (eV)                                                                 | 530.5 | 532.0 | 533.4 |
| relative concentration (at%)<br>CNT( $\text{Fe}^{2+}_7\text{Al}^{3+}_3\text{-O}$ )  | 0.25  | 2.06  | 2.69  |
| relative concentration (at%)<br>PCNT( $\text{Fe}^{2+}_7\text{Al}^{3+}_3\text{-O}$ ) | 0.26  | 2.98  | 3.23  |

**Table S7. Binding energy and the relative concentration (at%) of N species in the CNT ( $\text{Fe}^{2+}_7\text{Al}^{3+}_3\text{-O}$ ) and PCNT ( $\text{Fe}^{2+}_7\text{Al}^{3+}_3\text{-O}$ ).**

| Group                                                                               | Pyridinic-N | Graphitic-N | N-oxide |
|-------------------------------------------------------------------------------------|-------------|-------------|---------|
| Binding Energy (eV)                                                                 | 398.8       | 399.5       | 400.8   |
| relative concentration (at%)<br>CNT( $\text{Fe}^{2+}_7\text{Al}^{3+}_3\text{-O}$ )  | 0.09        | 0.27        | 0.05    |
| relative concentration (at%)<br>PCNT( $\text{Fe}^{2+}_7\text{Al}^{3+}_3\text{-O}$ ) | 0.06        | 0.30        | 0.1     |



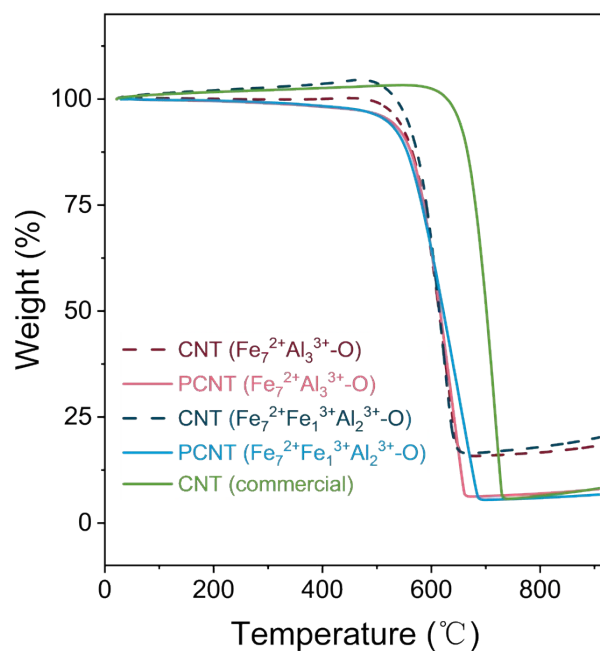

**Figure S11.** Thermogravimetric analysis (TGA) of various CNTs. The samples were heated from room temperature at a rate of 10 °C min<sup>-1</sup> under air condition.

**Table S8. Structural properties of Carbon products from CH<sub>4</sub> decomposition.**

| Carbon products                                                          | I <sub>D</sub> /I <sub>G</sub> | Specific surface area (m <sup>2</sup> g <sup>-1</sup> ) | Pore diameter (nm) | Total pore volume (cm <sup>3</sup> g <sup>-1</sup> ) |
|--------------------------------------------------------------------------|--------------------------------|---------------------------------------------------------|--------------------|------------------------------------------------------|
| CNT <sup>2</sup><br>(Previous work)                                      | 1.11                           | 269.375                                                 | 2.897              | 0.613                                                |
| PCNT<br>(Fe <sup>2+</sup> <sub>7</sub> Al <sup>3+</sup> <sub>3</sub> -O) | 0.64                           | 80.2                                                    | 3.827              | 0.399                                                |

**Table S9. Fitting EIS results of the as-prepared NFS//Na half cells**

| Conduct                                                                  | Number of cycles | R <sub>ohm</sub> (Ω) | R <sub>SEI</sub> (Ω) | R <sub>CT</sub> (Ω) |
|--------------------------------------------------------------------------|------------------|----------------------|----------------------|---------------------|
| CNT<br>(commercial)                                                      | 0                | 3.79                 | 8.55                 | 4.63                |
| CNT<br>(commercial)                                                      | 127              | 8.50                 | 42.24                | 20.4                |
| PCNT<br>(Fe <sup>2+</sup> <sub>7</sub> Al <sup>3+</sup> <sub>3</sub> -O) | 0                | 3.12                 | 13.47                | 7.27                |
| PCNT<br>(Fe <sup>2+</sup> <sub>7</sub> Al <sup>3+</sup> <sub>3</sub> -O) | 127              | 7.90                 | 41.84                | 21.59               |

**Table S10. Comparison of electrical conductivity with CNT (commercial), CNT( $\text{Fe}^{2+}_7\text{Al}^{3+}_3\text{-O}$ ), and PCNT( $\text{Fe}^{2+}_7\text{Al}^{3+}_3\text{-O}$ ).**

| Samples                                                                   | Conductivity<br>( $\text{S cm}^{-1}$ ) | Weight of sample<br>(g) | Specific conductivity<br>( $\text{S cm}^2 \text{g}^{-1}$ ) |
|---------------------------------------------------------------------------|----------------------------------------|-------------------------|------------------------------------------------------------|
| <b>CNTs<br/>(commercial)</b>                                              | 12.32                                  | 0.0394                  | 3983.3                                                     |
| <b>CNTs<br/>(<math>\text{Fe}^{2+}_7\text{Al}^{3+}_3\text{-O}</math>)</b>  | 10.57<br>6.531 (2)                     | 0.0477<br>0.0436 (2)    | 2822.8<br>1908.2 (2)                                       |
| <b>PCNTs<br/>(<math>\text{Fe}^{2+}_7\text{Al}^{3+}_3\text{-O}</math>)</b> | 20.34<br>8.598 (2)                     | 0.0585<br>0.0468 (2)    | 4429.2<br>2512.1 (2)                                       |

Notes: The electrical conductivity test results for powder samples are dependent on the density of the table-shaped test samples and the pressure applied during their formation (i.e., two of the important factors). The data displayed in green are those from repeated experiments.

## References

- (1) Yan, P.; Zhang, K.; Peng, Y. Study of  $\text{Fe}_2\text{O}_3\text{-Al}_2\text{O}_3$  catalyst reduction parameters and conditions for catalytic methane decomposition. *Chemical Engineering Science* **2022**, *250*, 117410. DOI: 10.1016/j.ces.2021.117410.
- (2) Wu, Z.; Li, X.; Xie, F.; Chen, R.; Deng, C.; Weng, G.-M. Sustainable pyrolytic carbon negative electrodes for sodium-ion batteries. *Journal of Power Sources* **2024**, *621*. DOI: 10.1016/j.jpowsour.2024.235262.
